# Supplementary material for: Programmers show distinct, language-like brain responses to violations in form and meaning when reading code
Source: Research Square preprint supplement (doi:10.21203/rs.3.rs-3396298/v1), 2023-10-02
Supplement: Supplementary file 1 [file 41bea108815f83dbcc8144b2.xlsx]

## Sheet: Sheet1
Supplementary Table 8.
Two-tailed Welch’s independent samples t-tests comparing Python Experts and Python Novices on demographic information.
Demographic Measure	t	df	p	Cohen’s d
English-related measures
Age of first exposure to English	1.77	32.83	0.085	-0.55
Age achieving general fluency in English	0.85	27.14	0.401	-0.27
Overall self-rated English proficiency	0.54	34.21	0.591	0.17
*Nelson-Denny reading comprehension test	2.12	22.98	0.045	0.68
Python-related measures
**Number of months since first exposure to Python	4.05	40.79	<.001	1.16
**Including Python, number of programming languages with prior experience	3.39	32.88	0.002	1.05
***Overall self-rated Python proficiency	4.4	34.09	<.001	1.35
**Reading proficiency	3.92	32.63	<.001	1.21
**Debugging proficiency	3.64	35.39	<.001	1.11
***Writing proficiency	4.96	34.56	<.001	1.52
**Overall daily usage of Python	3.64	30.95	<.001	1.01
**Daily minutes reading Python	3.08	31.33	0.004	0.85
**Daily minutes debugging Python	3.71	29.83	<.001	1.02
**Daily minutes writing Python	3.25	29.56	0.003	0.89
**Number of months spent using Python in a work environment	2.62	36.86	0.013	0.74
**Number of months spent using Python in a school environment	2.18	42.49	0.035	0.63
**Number of months spent using Python in a personal environment	2.28	26.61	0.031	0.62
***Python knowledge test	6.72	20.68	<.001	2.19
Note. Uncorrected p-values are reported in the table. *p <.05 uncorrected **p <.05 FDR corrected ***p <.001 FDR corrected
