# Supplementary material for: Programmers show distinct, language-like brain responses to violations in form and meaning when reading code
Source: Research Square preprint supplement (doi:10.21203/rs.3.rs-3396298/v1), 2023-10-02
Supplement: Supplementary file 1 [file bdb8607f3a42194d8bc29dbe.pdf]

Supplementary Information for:

Programmers show distinct, language-like brain responses to violations in form and meaning  
when reading code

Chu-Hsuan Kuo\* and Chantel S. Prat

**Supplementary Table 1.**

Mixed ANOVA results for code acceptability judgments.

| <b>Effect</b>                          | <b><i>df</i></b> | <b><i>F</i></b> | <b><i>p</i></b> | <b><math>\eta_p^2</math></b> |
|----------------------------------------|------------------|-----------------|-----------------|------------------------------|
| Between-subjects effects               |                  |                 |                 |                              |
| Expertise                              | 1.00             | 0.27            | .604            | 0.01                         |
| Error (Expertise)                      | 43.00            |                 |                 |                              |
| Within-subjects effects                |                  |                 |                 |                              |
| Semantic P.                            | 1.00             | 19.88           | <.001           | 0.32                         |
| Semantic P. x Expertise                | 1.00             | 3.42            | .071            | 0.07                         |
| Error (Semantic P.)                    | 43.00            |                 |                 |                              |
| *Syntactic V.                          | 1.00             | 140.32          | <.001           | 0.77                         |
| *Syntactic V. x Expertise              | 1.00             | 25.62           | <.001           | 0.37                         |
| Error (Syntactic V.)                   | 43.00            |                 |                 |                              |
| Semantic P. x Syntactic V.             | 1.00             | 0.39            | .538            | 0.01                         |
| Semantic P. x Syntactic V. x Expertise | 1.00             | 0.00            | .955            | 0.00                         |
| Error (Semantic P. x Syntactic V.)     | 43.00            |                 |                 |                              |

*Note.* Semantic P. = Semantic Plausibility; Syntactic V. = Syntactic Validity. The Greenhouse-Geisser correction for inhomogeneity of variance was applied to all reported statistics. \*significant at a familywise alpha of .05.

**Supplementary Table 2.**

Mixed ANOVA results for the N400 window (300-500 ms).

*See Excel file.*

**Supplementary Table 3.**

Mixed ANOVA results for the P600 window (500-800 ms).

*See Excel file.*

**Supplementary Table 4.**

Mixed ANOVA results at the Fz electrode location for the P600 window (500-800 ms).

| <b>Effect</b>                          | <b><i>df</i></b> | <b><i>F</i></b> | <b><i>p</i></b> | <b><math>\eta_p^2</math></b> |
|----------------------------------------|------------------|-----------------|-----------------|------------------------------|
| Between-subjects effects               |                  |                 |                 |                              |
| Expertise                              | 1.00             | 3.76            | .059            | 0.08                         |
| Error (Expertise)                      | 43.00            |                 |                 |                              |
| Within-subjects effects                |                  |                 |                 |                              |
| Semantic P.                            | 1.00             | 0.55            | .464            | 0.01                         |
| Semantic P. x Expertise                | 1.00             | 0.06            | .806            | 0.00                         |
| Error (Semantic P.)                    | 43.00            |                 |                 |                              |
| **Syntactic V.                         | 1.00             | 52.15           | <.001           | 0.55                         |
| *Syntactic V. x Expertise              | 1.00             | 4.93            | .032            | 0.10                         |
| Error (Syntactic V.)                   | 43.00            |                 |                 |                              |
| Semantic P. x Syntactic V.             | 1.00             | 0.00            | .993            | 0.00                         |
| Semantic P. x Syntactic V. x Expertise | 1.00             | 2.26            | .140            | 0.05                         |
| Error (Semantic P. x Syntactic V.)     | 43.00            |                 |                 |                              |

*Note.* Semantic P. = Semantic Plausibility; Syntactic V. = Syntactic Validity. The Greenhouse-Geisser correction for inhomogeneity of variance was applied to all reported statistics. \*significant at an unadjusted alpha of .05; \*\*significant at a Bonferroni-adjusted alpha of .05/3.

**Supplementary Table 5.**

Mixed ANOVA results at the Cz electrode location for the P600 window (500-800 ms).

| Effect                                 | <i>df</i> | <i>F</i> | <i>p</i> | $\eta_p^2$ |
|----------------------------------------|-----------|----------|----------|------------|
| Between-subjects effects               |           |          |          |            |
| **Expertise                            | 1.00      | 8.91     | .005     | 0.17       |
| Error (Expertise)                      | 43.00     |          |          |            |
| Within-subjects effects                |           |          |          |            |
| Semantic P.                            | 1.00      | 1.02     | .319     | 0.02       |
| Semantic P. x Expertise                | 1.00      | 2.07     | .157     | 0.05       |
| Error (Semantic P.)                    | 43.00     |          |          |            |
| **Syntactic V.                         | 1.00      | 65.14    | <.001    | 0.60       |
| *Syntactic V. x Expertise              | 1.00      | 5.34     | .026     | 0.11       |
| Error (Syntactic V.)                   | 43.00     |          |          |            |
| Semantic P. x Syntactic V.             | 1.00      | 0.33     | .566     | 0.01       |
| Semantic P. x Syntactic V. x Expertise | 1.00      | 0.97     | .331     | 0.02       |
| Error (Semantic P. x Syntactic V.)     | 43.00     |          |          |            |

*Note.* Semantic P. = Semantic Plausibility; Syntactic V. = Syntactic Validity. The Greenhouse-Geisser correction for inhomogeneity of variance was applied to all reported statistics. \*significant at an unadjusted alpha of .05; \*\*significant at a Bonferroni-adjusted alpha of .05/3.

**Supplementary Table 6.**

Mixed ANOVA results at the Pz electrode location for the P600 window (500-800 ms).

| Effect                                 | <i>df</i> | <i>F</i> | <i>p</i> | $\eta_p^2$ |
|----------------------------------------|-----------|----------|----------|------------|
| Between-subjects effects               |           |          |          |            |
| **Expertise                            | 1.00      | 9.85     | .003     | 0.19       |
| Error (Expertise)                      | 43.00     |          |          |            |
| Within-subjects effects                |           |          |          |            |
| Semantic P.                            | 1.00      | 0.81     | .373     | 0.02       |
| Semantic P. x Expertise                | 1.00      | 2.76     | .104     | 0.06       |
| Error (Semantic P.)                    | 43.00     |          |          |            |
| **Syntactic V.                         | 1.00      | 50.04    | <.001    | 0.54       |
| **Syntactic V. x Expertise             | 1.00      | 6.97     | .012     | 0.14       |
| Error (Syntactic V.)                   | 43.00     |          |          |            |
| *Semantic P. x Syntactic V.            | 1.00      | 4.08     | .0498    | 0.09       |
| Semantic P. x Syntactic V. x Expertise | 1.00      | 0.09     | .762     | 0.00       |
| Error (Semantic P. x Syntactic V.)     | 43.00     |          |          |            |

*Note.* Semantic P. = Semantic Plausibility; Syntactic V. = Syntactic Validity. The Greenhouse-Geisser correction for inhomogeneity of variance was applied to all reported statistics. \*significant at an unadjusted alpha of .05; \*\*significant at a Bonferroni-adjusted alpha of .05/3.

**Supplementary Table 7.**

Descriptive statistics for participant demographic information.

*See Excel file.*

**Supplementary Table 8.**

Two-tailed Welch's independent samples  $t$ -tests comparing Python Experts and Python Novices on demographic information.

*See Excel file.*
