# Supplementary material for: Programmers show distinct, language-like brain responses to violations in form and meaning when reading code
Source: Research Square preprint supplement (doi:10.21203/rs.3.rs-3396298/v1), 2023-10-02
Supplement: Supplementary file 2 [file 6ddd39e2829f235e8eb103e4.xlsx]

## Sheet: Sheet1
Supplementary Table 7.
Descriptive statistics for participant demographic information.
Demographic Measure	Group	Mean	SD	Min	Max
English-related measures
Age of first exposure to English	Whole Group	2.07	2.7	0	9
	Experts	1.48	2.47	0	9
	Novices	2.94	2.86	0	8
Age achieving general fluency	Whole Group	7.02	5.8	0	24
	Experts	6.37	4.77	0	18
	Novices	8	7.11	0	24
Overall self-rated English proficiency (0-10)	Whole Group	9.3	1.09	6.33	10
	Experts	9.37	1.06	6.33	10
	Novices	9.19	1.16	7	10
Nelson-Denny reading comprehension test	Whole Group	81.81	17.15	26.32	100
	Experts	86.55	11.2	55.26	100
	Novices	74.71	21.91	26.32	100
Python-related measures
Number of months since first exposure to Python	Whole Group	29.22	26.85	3	120
	Experts	39.63	28.31	4	120
	Novices	13.61	14.48	3	60
Including Python, number of programming languages with prior experience (1-5)	Whole Group	3.07	1.48	1	5
	Experts	3.63	1.24	2	5
	Novices	2.22	1.44	1	5
Overall self-rated	Whole Group	5.29	2.32	1.33	9.33
	Experts	6.35	1.86	2	9.33
	Novices	3.7	2.05	1.33	7.67
Reading proficiency	Whole Group	5.64	2.24	2	10
	Experts	6.59	1.8	2	10
	Novices	4.22	2.1	2	8
Debugging proficiency	Whole Group	5.02	2.57	1	9
	Experts	6.04	2.23	2	9
	Novices	3.5	2.33	1	8
Writing proficiency	Whole Group	5.2	2.46	1	9
	Experts	6.41	1.91	2	9
	Novices	3.39	2.06	1	7
Overall daily usage of Python (minutes)	Whole Group	27.22	40.74	0	140
	Experts	41.05	47.09	0	140
	Novices	6.48	12.11	0	36.67
Daily minutes reading Python	Whole Group	32.96	54.92	0	240
	Experts	49.19	64.99	0	240
	Novices	8.61	17.39	0	60
Daily minutes debugging Python	Whole Group	19.58	29.37	0	120
	Experts	29.67	34.02	0	120
	Novices	4.44	7.65	0	20
Daily minutes writing Python	Whole Group	29.13	49.48	0	240
	Experts	44.3	58.65	0	240
	Novices	6.39	12.7	0	45
Number of months spent using Python in a work environment	Whole Group	8.27	15.03	0	60
	Experts	12.22	17.58	0	60
	Novices	2.33	7.08	0	30
Number of months spent using Python in a school environment	Whole Group	13.18	20.72	0	108
	Experts	18	23.31	0	108
	Novices	5.94	13.7	0	60
Number of months spent using Python in a personal environment	Whole Group	9.78	22.37	0	120
	Experts	14.7	27.93	0	120
	Novices	2.39	2.48	0	10
Python knowledge test	Whole Group	73.09	13.91	30.56	94.44
	Experts	81.69	5.17	75	94.44
	Novices	60.18	12.9	30.56	73.61
Note. Sample sizes: Whole Group (N = 45); Experts (N = 27); Novices (N = 18)
