# Supplementary material for: Programmers show distinct, language-like brain responses to violations in form and meaning when reading code
Source: Research Square preprint supplement (doi:10.21203/rs.3.rs-3396298/v1), 2023-10-02
Supplement: Supplementary file 3 [file 6f3b839e6e5078ee24b4e5b2.xlsx]

## Sheet: Sheet1
Supplementary Table 2.
Mixed ANOVA results for the N400 window (300-500 ms).
Effect		df	F	p	ηp2
Between-subjects effects
	Expertise	1	3.45	0.07	0.07
	Error (Expertise)	43
Within-subjects effects
	*Semantic P.	1	28.02	<.001	0.39
	Semantic P. x Expertise	1	1.06	0.309	0.02
	Error (Semantic P.)	43
	*Syntactic V.	1	23.4	<.001	0.35
	Syntactic V. x Expertise	1	3.83	0.057	0.08
	Error (Syntactic V.)	43
	*Electrode	1.26	8.46	0.003	0.16
	Electrode x Expertise	1.26	0.23	0.688	0.01
	Error (Electrode)	54.06
	Semantic P. x Syntactic V.	1	2.33	0.134	0.05
	Semantic P. x Syntactic V. x Expertise	1	3.83	0.057	0.08
	Error (Semantic P. x Syntactic V.)	43
	*Semantic P. x Electrode	1.41	10.45	<.001	0.2
	Semantic P. x Electrode x Expertise	1.41	0.07	0.866	0
	Error (Semantic P. x Electrode)	60.65
	*Syntactic V. x Electrode	1.34	9.42	0.001	0.18
	Syntactic V. x Electrode x Expertise	1.34	1.8	0.184	0.04
	Error (Syntactic V. x Electrode)	57.71
	Semantic P. x Syntactic V. x Electrode	1.44	1.84	0.176	0.04
	Semantic P. x Syntactic V. x Electrode x Expertise	1.44	0.58	0.507	0.01
	Error (Semantic P. x Syntactic V. x Electrode)	62.01
Note. Semantic P. = Semantic Plausibility; Syntactic V. = Syntactic Validity. The Greenhouse-Geisser correction for inhomogeneity of variance was applied to all reported statistics. *significant at a familywise alpha of .05
