# Supplementary material for: Programmers show distinct, language-like brain responses to violations in form and meaning when reading code
Source: Research Square preprint supplement (doi:10.21203/rs.3.rs-3396298/v1), 2023-10-02
Supplement: Supplementary file 4 [file bd5f4996e63143f9d6c91e44.xlsx]

## Sheet: Sheet1
Supplementary Table 3.
Mixed ANOVA results for the P600 window (500-800 ms).
Effect		df	F	p	ηp2
Between-subjects effects
	*Expertise	1	8.89	0.005	0.17
	Error (Expertise)	43
Within-subjects effects
	Semantic P.	1	0.16	0.691	0
	Semantic P. x Expertise	1	1.3	0.261	0.03
	Error (Semantic P.)	43
	*Syntactic V.	1	67.71	<.001	0.61
	*Syntactic V. x Expertise	1	7.01	0.011	0.14
	Error (Syntactic V.)	43
	*Electrode	1.32	42.39	<.001	0.5
	Electrode x Expertise	1.32	3.35	0.061	0.07
	Error (Electrode)	56.79
	Semantic P. x Syntactic V.	1	1.05	0.311	0.02
	Semantic P. x Syntactic V. x Expertise	1	1.07	0.308	0.02
	Error (Semantic P. x Syntactic V.)	43
	Semantic P. x Electrode	1.4	3.15	0.067	0.07
	Semantic P. x Electrode x Expertise	1.4	1.34	0.262	0.03
	Error (Semantic P. x Electrode)	59.99
	Syntactic V. x Electrode	1.41	0.05	0.897	0
	SV x Electrode x Expertise	1.41	0.32	0.652	0.01
	Error (Syntactic V. x Electrode)	60.75
	*Semantic P. x Syntactic V. x Electrode	1.59	3.53	0.045	0.08
	Semantic P. x Syntactic V. x Electrode x Expertise	1.59	0.92	0.384	0.02
	Error (Semantic P. x Syntactic V. x Electrode)	68.2
Note. Semantic P. = Semantic Plausibility; Syntactic V. = Syntactic Validity. The Greenhouse-Geisser correction for inhomogeneity of variance was applied to all reported statistics. *significant at a familywise alpha of .05
